# Supplementary material for: Real-world performance of blood-based proteomic profiling in first-line immunotherapy treatment in advanced stage non-small cell lung cancer
Source: PubMed Central journal article supplement — J Immunother Cancer. 2021 Oct 27;9(10):e002989. doi: 10.1136/jitc-2021-002989 (PMC8552188; doi:10.1136/jitc-2021-002989), 2021-10-27
Supplement: jitc-2021-002989supp001.pdf [file jitc-2021-002989supp001.pdf]

**Table S1.** Metastases in Analysis Population with advanced disease and no prior therapy (N=877)

| <b>Metastases, N (%)</b> |             |
|--------------------------|-------------|
| Bone                     | 188 (21.4%) |
| Brain                    | 162 (18.5%) |
| None                     | 79 (9.0%)   |
| Other                    | 448 (51.1%) |

**Table S2.** Patient characteristics by ICI treatment group (N=278).

|                                            | ICI + Chemotherapy<br>(N=161) | ICI Monotherapy<br>(N=117) | Total<br>(N=278)  | p value      |
|--------------------------------------------|-------------------------------|----------------------------|-------------------|--------------|
| <b>Age</b>                                 |                               |                            |                   | 0.120        |
| Mean (SD)                                  | 65.6 (9.8)                    | 67.8 (10.8)                | 66.5 (10.3)       |              |
| Median (Q1, Q3)                            | 65.9 (58.9, 73.2)             | 66.5 (60.1, 76.9)          | 66.1 (59.5, 74.8) |              |
| Min - Max                                  | 36.5 - 87.7                   | 35.1 - 90.2                | 35.1 - 90.2       |              |
| <b>Age Category, n (%)</b>                 |                               |                            |                   | <b>0.043</b> |
| >75                                        | 31 (19.3%)                    | 37 (31.6%)                 | 68 (24.5%)        |              |
| 65 to 75                                   | 53 (32.9%)                    | 28 (23.9%)                 | 81 (29.1%)        |              |
| <65                                        | 77 (47.8%)                    | 52 (44.4%)                 | 129 (46.4%)       |              |
| <b>HIC, n (%)</b>                          |                               |                            |                   | 0.746        |
| HIC-Hot                                    | 113 (70.2%)                   | 80 (68.4%)                 | 193 (69.4%)       |              |
| HIC-Cold                                   | 48 (29.8%)                    | 37 (31.6%)                 | 85 (30.6%)        |              |
| <b>Gender, n (%)</b>                       |                               |                            |                   | 0.296        |
| Female                                     | 71 (44.1%)                    | 59 (50.4%)                 | 130 (46.8%)       |              |
| Male                                       | 90 (55.9%)                    | 58 (49.6%)                 | 148 (53.2%)       |              |
| <b>Disease Stage at Study Entry, n (%)</b> |                               |                            |                   | 0.937        |
| Stage IIIB                                 | 10 (6.2%)                     | 7 (6.0%)                   | 17 (6.1%)         |              |
| Stage IV                                   | 151 (93.8%)                   | 110 (94.0%)                | 261 (93.9%)       |              |
| <b>Histology, n (%)</b>                    |                               |                            |                   | <b>0.012</b> |
| Adenocarcinoma                             | 131 (81.4%)                   | 77 (65.8%)                 | 208 (74.8%)       |              |
| NSCLC Other                                | 13 (8.1%)                     | 19 (16.2%)                 | 32 (11.5%)        |              |

|                                                      |            |            |             |         |
|------------------------------------------------------|------------|------------|-------------|---------|
| Squamous                                             | 17 (10.6%) | 21 (17.9%) | 38 (13.7%)  |         |
| <b>Smoking Status, n (%)</b>                         |            |            |             | 0.680   |
| Currently Smokes                                     | 62 (38.5%) | 43 (36.8%) | 105 (37.8%) |         |
| Ex-Smoker                                            | 81 (50.3%) | 64 (54.7%) | 145 (52.2%) |         |
| Never smoked                                         | 18 (11.2%) | 10 (8.5%)  | 28 (10.1%)  |         |
| <b>ECOG Performance Status at Study Entry, n (%)</b> |            |            |             | 0.093   |
| Zero                                                 | 40 (24.8%) | 26 (22.2%) | 66 (23.7%)  |         |
| One                                                  | 92 (57.1%) | 55 (47.0%) | 147 (52.9%) |         |
| Two                                                  | 26 (16.1%) | 31 (26.5%) | 57 (20.5%)  |         |
| Three                                                | 3 (1.9%)   | 5 (4.3%)   | 8 (2.9%)    |         |
| <b>PD-L1 Expression, n (%)</b>                       |            |            |             | < 0.001 |
| ≥50                                                  | 39 (24.2%) | 83 (70.9%) | 122 (43.9%) |         |
| 1 to 50                                              | 36 (22.4%) | 9 (7.7%)   | 45 (16.2%)  |         |
| <1                                                   | 25 (15.5%) | 6 (5.1%)   | 31 (11.2%)  |         |
| NA                                                   | 61 (37.9%) | 19 (16.2%) | 80 (28.8%)  |         |

**Table S3.** Patient characteristics by ICI treatment group for PS0-1, PD-L1 High subgroup (N=91).

|                            | ICI + Chemotherapy<br>(N=33) | ICI Monotherapy<br>(N=58) | Total (N=91)      | p value |
|----------------------------|------------------------------|---------------------------|-------------------|---------|
| <b>Age</b>                 |                              |                           |                   | 0.811   |
| Mean (SD)                  | 65.4 (11.1)                  | 66.0 (10.6)               | 65.8 (10.7)       |         |
| Median (Q1, Q3)            | 66.7 (56.9, 74.9)            | 65.1 (58.0, 75.7)         | 65.3 (57.7, 75.6) |         |
| Min - Max                  | 36.5 - 81.3                  | 44.9 - 85.7               | 36.5 - 85.7       |         |
| <b>Age Category, n (%)</b> |                              |                           |                   | 0.859   |
| >75                        | 8 (24.2%)                    | 16 (27.6%)                | 24 (26.4%)        |         |
| 65 to 75                   | 9 (27.3%)                    | 13 (22.4%)                | 22 (24.2%)        |         |
| <65                        | 16 (48.5%)                   | 29 (50.0%)                | 45 (49.5%)        |         |
| <b>HIC, n (%)</b>          |                              |                           |                   | 0.821   |

|                                                      |            |            |            |       |
|------------------------------------------------------|------------|------------|------------|-------|
| HIC-Hot                                              | 22 (66.7%) | 40 (69.0%) | 62 (68.1%) |       |
| HIC-Cold                                             | 11 (33.3%) | 18 (31.0%) | 29 (31.9%) |       |
| <b>Gender, n (%)</b>                                 |            |            |            | 0.539 |
| Female                                               | 16 (48.5%) | 32 (55.2%) | 48 (52.7%) |       |
| Male                                                 | 17 (51.5%) | 26 (44.8%) | 43 (47.3%) |       |
| <b>Disease Stage at Study Entry, n (%)</b>           |            |            |            | 0.469 |
| Stage IIIB                                           | 3 (9.1%)   | 3 (5.2%)   | 6 (6.6%)   |       |
| Stage IV                                             | 30 (90.9%) | 55 (94.8%) | 85 (93.4%) |       |
| <b>Histology, n (%)</b>                              |            |            |            | 0.213 |
| Adenocarcinoma                                       | 28 (84.8%) | 40 (69.0%) | 68 (74.7%) |       |
| NSCLC Other                                          | 2 (6.1%)   | 10 (17.2%) | 12 (13.2%) |       |
| Squamous                                             | 3 (9.1%)   | 8 (13.8%)  | 11 (12.1%) |       |
| <b>Smoking Status, n (%)</b>                         |            |            |            | 0.119 |
| Currently Smokes                                     | 12 (36.4%) | 22 (37.9%) | 34 (37.4%) |       |
| Ex-Smoker                                            | 14 (42.4%) | 32 (55.2%) | 46 (50.5%) |       |
| Never smoked                                         | 7 (21.2%)  | 4 (6.9%)   | 11 (12.1%) |       |
| <b>ECOG Performance Status at Study Entry, n (%)</b> |            |            |            | 0.756 |
| Zero                                                 | 12 (36.4%) | 23 (39.7%) | 35 (38.5%) |       |
| One                                                  | 21 (63.6%) | 35 (60.3%) | 56 (61.5%) |       |

**Table S4.** Multivariate analysis of PD-L1 High, PS 0-1 subgroup.

| Covariate                             |                    | HR (95% CI for HR) | p.value  |
|---------------------------------------|--------------------|--------------------|----------|
| <b>HIC (vs HIC-C)</b>                 | HIC-H              | 0.31 (0.16-0.61)   | 8.00E-04 |
| <b>Treatment (vs ICI monotherapy)</b> | ICI + Chemotherapy | 0.637 (0.32-1.26)  | 0.1969   |
| <b>Age vs ≥65</b>                     | <65                | 0.762 (0.4-1.46)   | 0.4137   |
| <b>ECOG (vs 0)</b>                    | 1                  | 1.216 (0.61-2.41)  | 0.5758   |
