# Supplementary material for: Real-world performance of blood-based proteomic profiling in first-line immunotherapy treatment in advanced stage non-small cell lung cancer
Source: PubMed Central journal article supplement — J Immunother Cancer. 2021 Oct 27;9(10):e002989. doi: 10.1136/jitc-2021-002989 (PMC8552188; doi:10.1136/jitc-2021-002989), 2021-10-27
Supplement: jitc-2021-002989supp002.pdf [file jitc-2021-002989supp002.pdf]

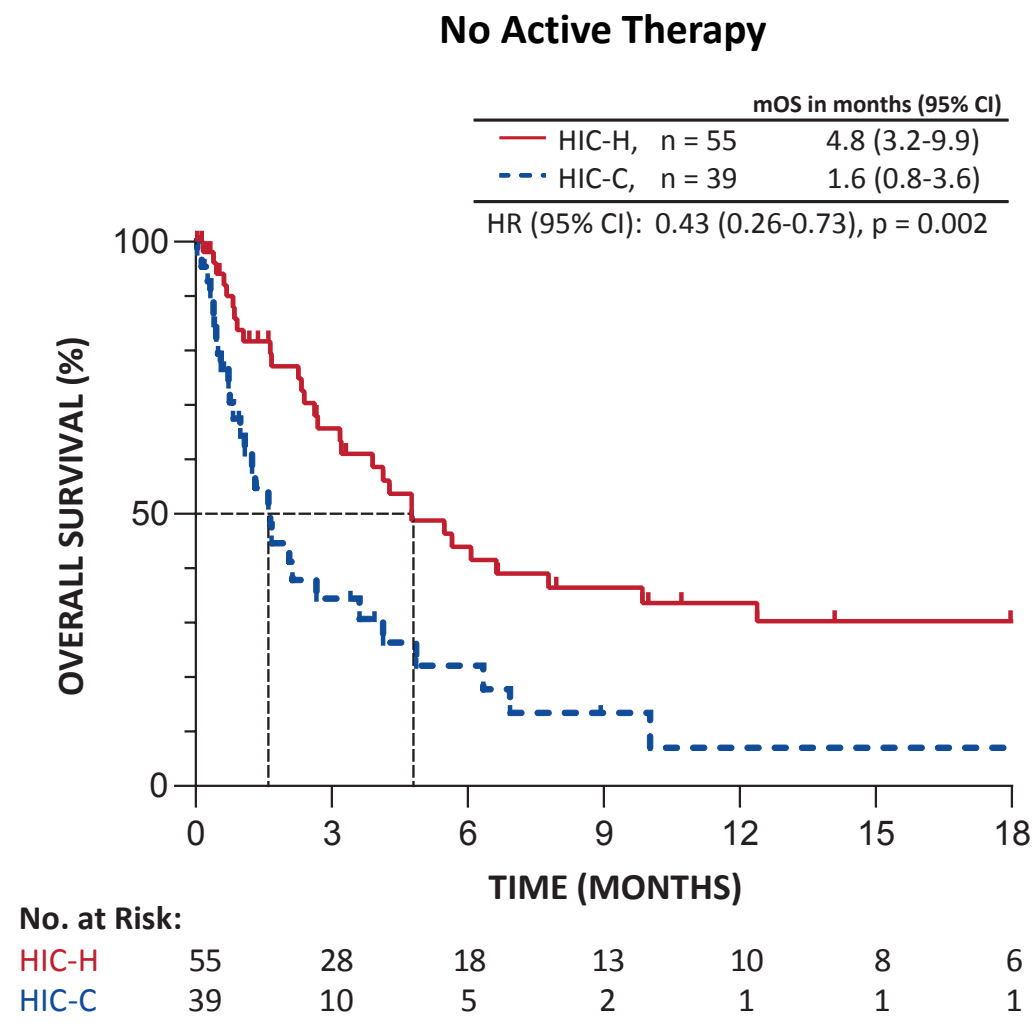

**Figure S1.** Kaplan-Meier analysis of overall survival in patients with advanced stage NSCLC not receiving active therapy in the first-line setting. CI, confidence interval; HIC-H, HIC-Hot; HIC-C, HIC-Cold; HR, hazard ratio; mOS, median overall survival; und, undefined.

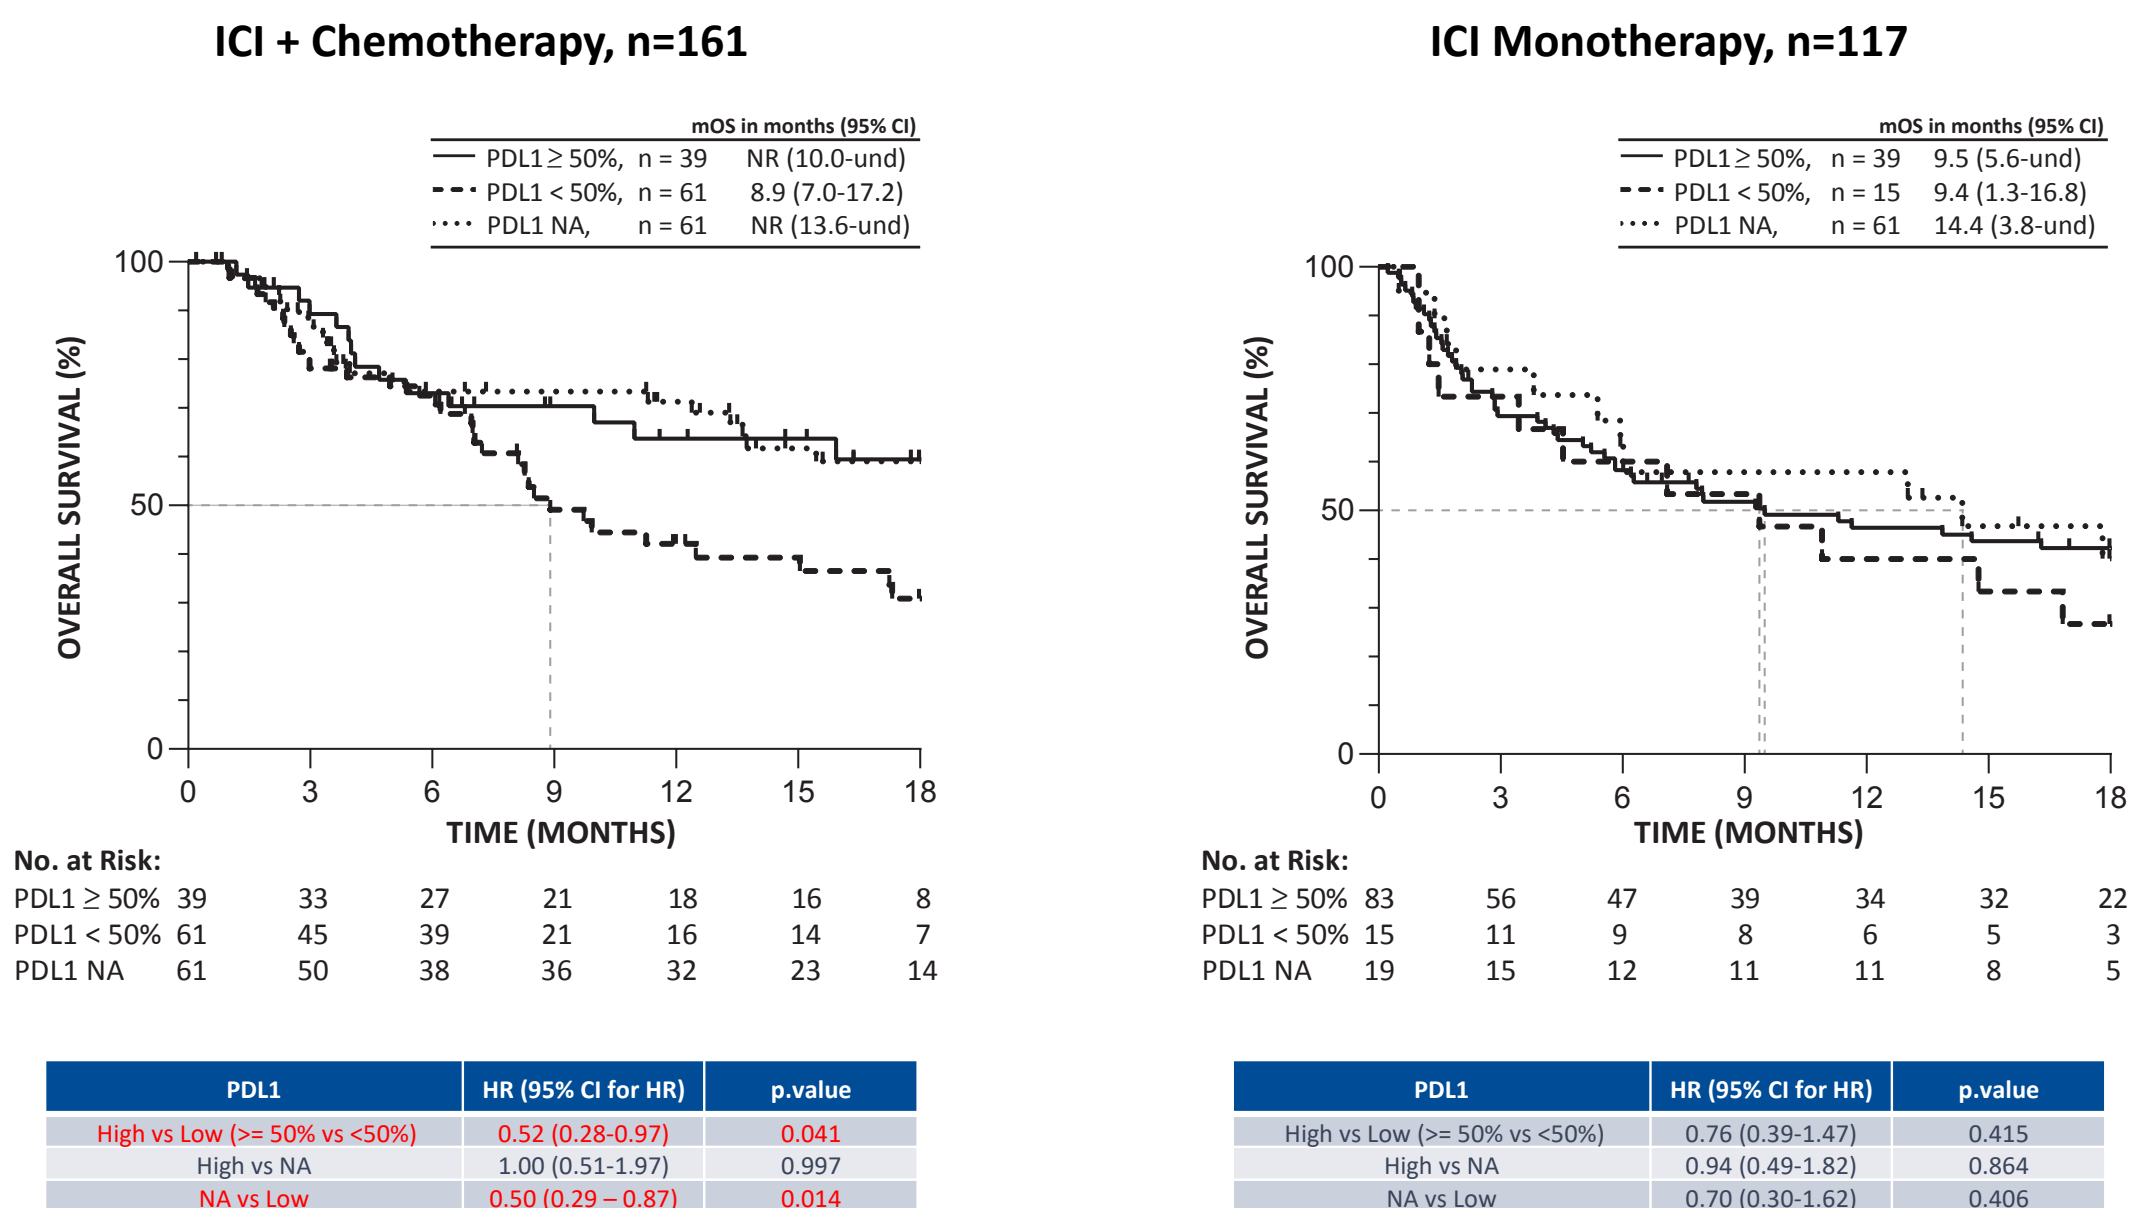

**Figure S2.** Kaplan-Meier analysis of overall survival in patients with advanced stage NSCLC receiving ICI alone or with chemotherapy in the first-line setting by PD-L1 expression, including PD-L1 status NA group. CI, confidence interval; HR, hazard ratio.
