# Supplementary material for: Real-world performance of blood-based proteomic profiling in first-line immunotherapy treatment in advanced stage non-small cell lung cancer
Source: PubMed Central journal article supplement — J Immunother Cancer. 2021 Oct 27;9(10):e002989. doi: 10.1136/jitc-2021-002989 (PMC8552188; doi:10.1136/jitc-2021-002989), 2021-10-27
Supplement: jitc-2021-002989supp003.pdf [file jitc-2021-002989supp003.pdf]

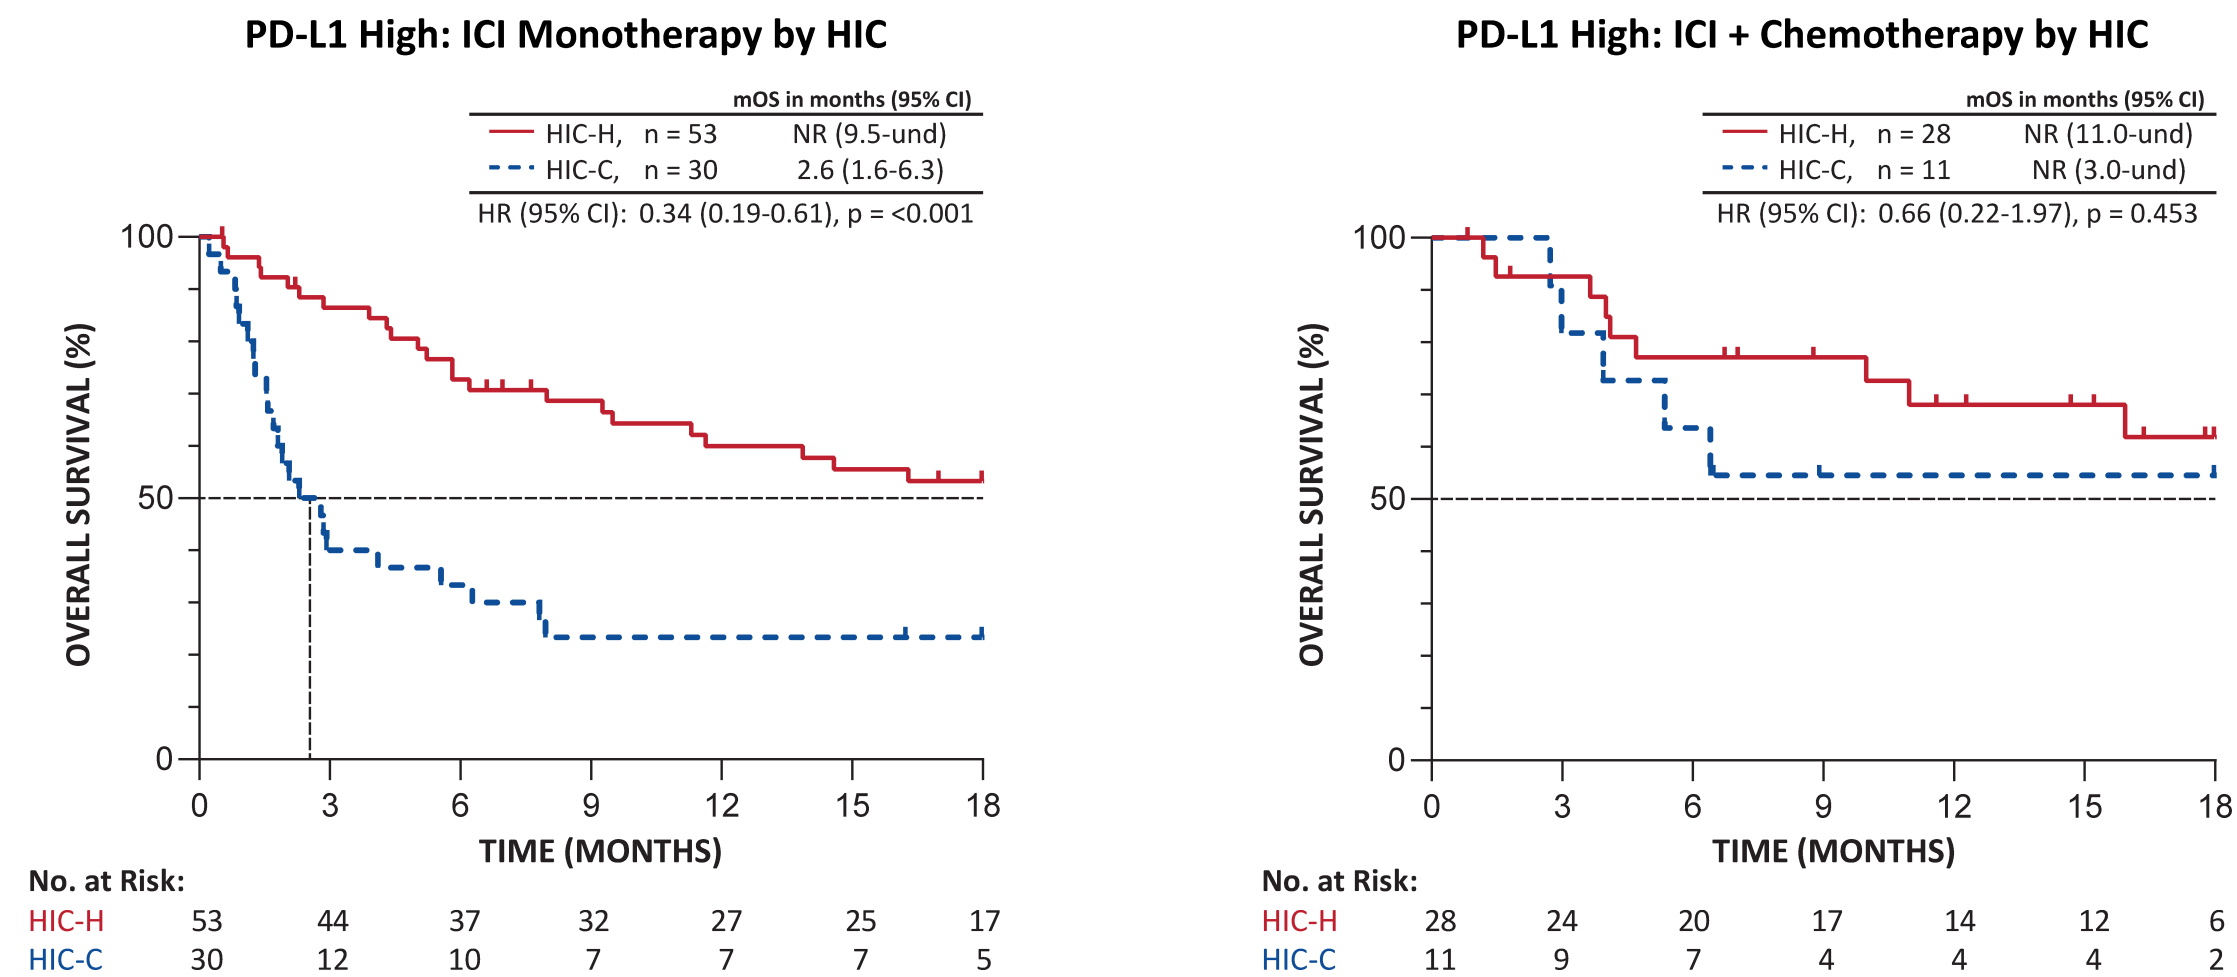

**Figure S3.** Kaplan-Meier analysis of overall survival in patients with advanced stage NSCLC, PD-L1 expression  $\geq 50\%$  receiving an ICI containing regimen in first-line setting by HIC classification, therapy type and multivariate analysis. CI, confidence interval; HIC-H, HIC-Hot; HIC-C, HIC-Cold; HR, hazard ratio; mOS, median overall survival; NR, not reached; PS, ECOG performance status; und, undefined.

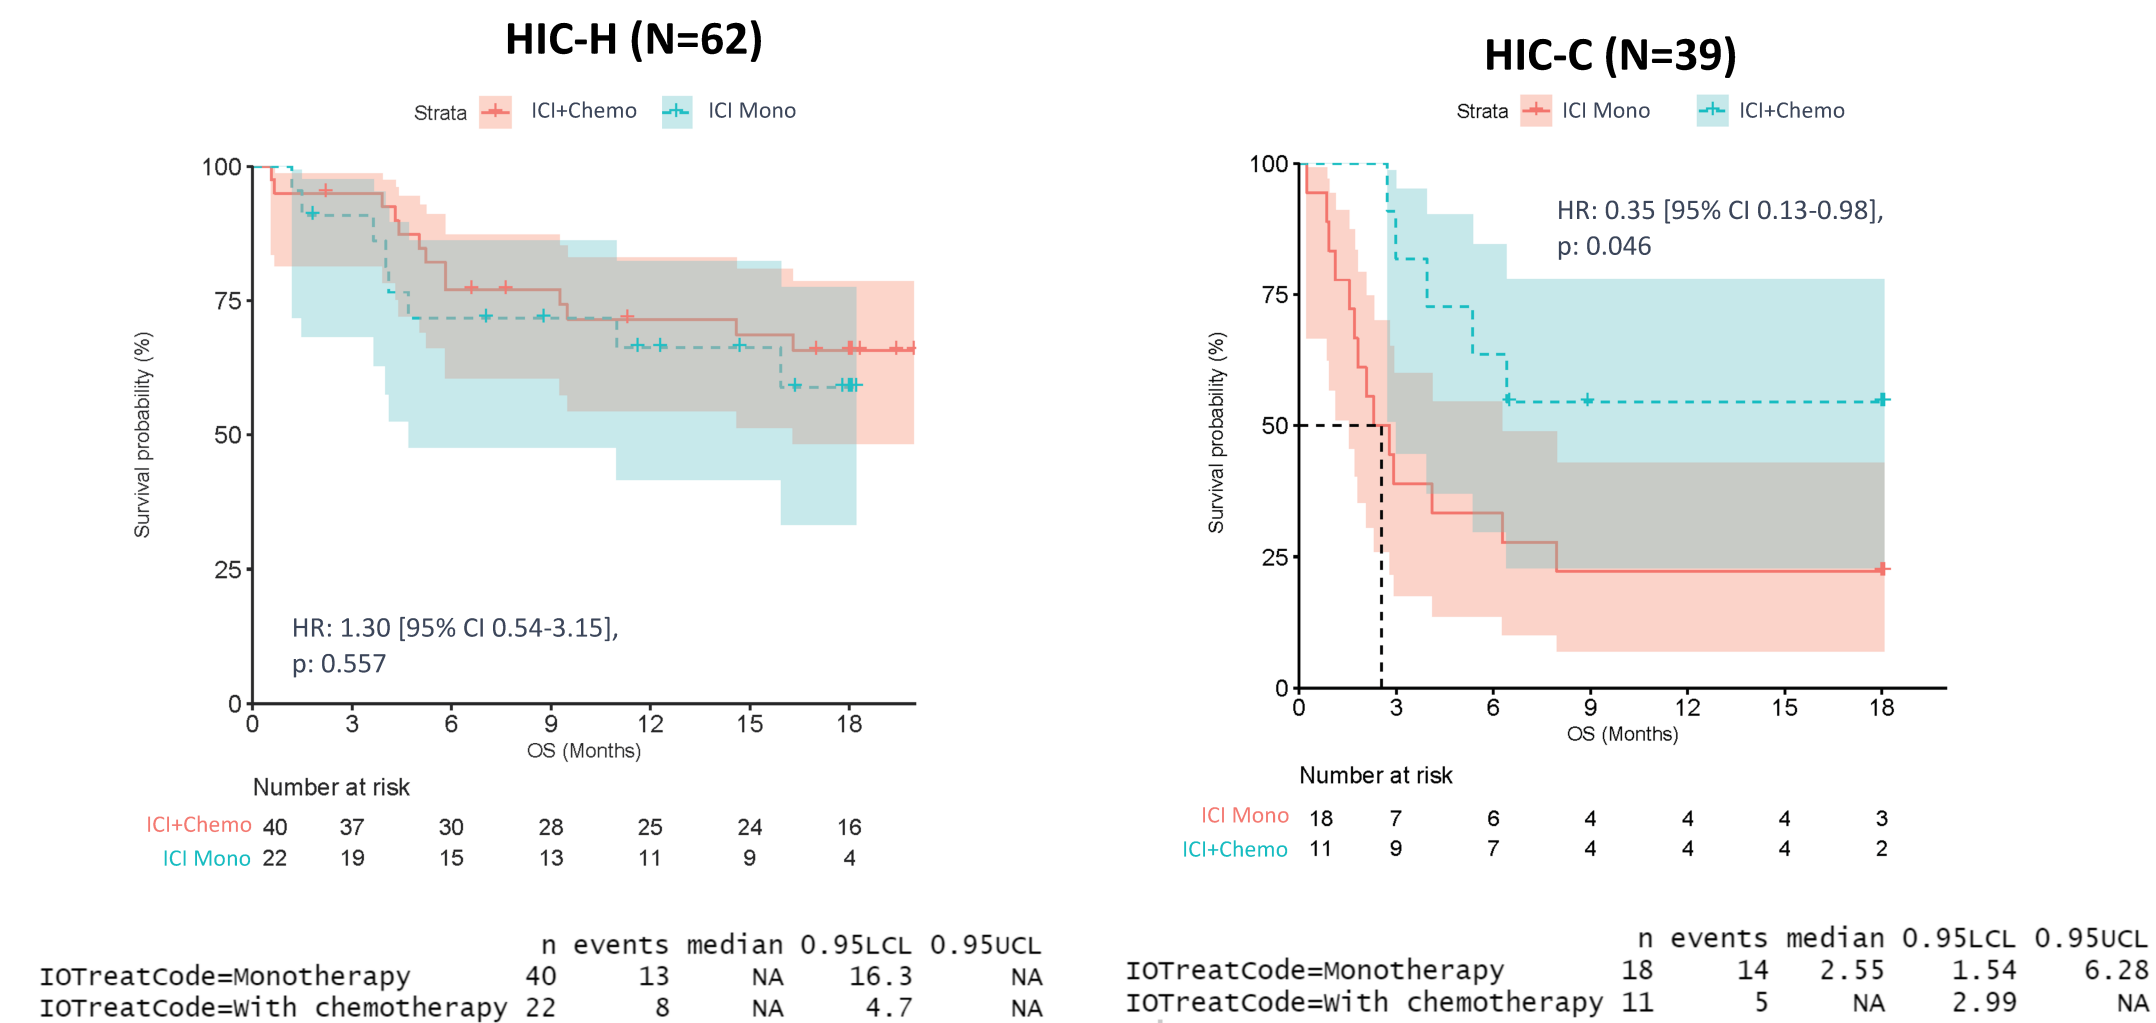

**Figure S4.** Kaplan-Meier analysis of overall survival in patients with advanced stage NSCLC, PS 0-1, and PD-L1 expression  $\geq 50\%$  receiving an ICI containing regimen in first-line setting by HIC, therapy type. CI, confidence interval; HIC-H, HIC-Hot; HIC-C, HIC-Cold; HR, hazard ratio; mOS, median overall survival; NR, not reached; PS, ECOG performance status; und, undefined.
